# Supplementary material for: Prevalence of conduct problems and social risk factors in ethnically diverse inner-city schools
Source: Springer Nature journal article supplement (doi:10.1186/s12889-021-10834-5), 2021-05-03
Supplement: MOESM3 [file 19127036]

Alternate Table 2. Risk Ratios for conduct problems by ethnic group (white British as reference group)

|                                     | Conduct problems         |                     | *Fighting/Bullying       |                     | *Rule-breaking           |                     |
|-------------------------------------|--------------------------|---------------------|--------------------------|---------------------|--------------------------|---------------------|
|                                     | Unadjusted RR<br>(95%CI) | Adjusted RR (95%CI) | Unadjusted RR<br>(95%CI) | Adjusted RR (95%CI) | Unadjusted RR<br>(95%CI) | Adjusted RR (95%CI) |
| <b>Ethnicity</b>                    |                          |                     |                          |                     |                          |                     |
| <b>Black African</b>                | 1.56 (1.13, 1.99)        | 1.53 (1.10, 1.96)   | 1.57 (1.40, 1.74)        | 1.60 (1.38, 1.82)   | 1.24 (1.01, 1.47)        | 1.27 (1.02, 1.52)   |
| <b>Black Caribbean</b>              | 2.22 (1.53, 2.90)        | 2.16 (1.50, 2.83)   | 1.58 (1.39, 1.77)        | 1.60 (1.41, 1.79)   | 1.48 (1.20, 1.76)        | 1.51 (1.22, 1.81)   |
| <b>Indian/Pakistani/Bangladeshi</b> | 0.83 (0.25, 1.40)        | 0.82 (0.27, 1.36)   | 1.27 (0.84, 1.69)        | 1.29 (0.84, 1.75)   | 0.76 (0.49, 1.04)        | 0.76 (0.49, 1.04)   |
| <b>Latin American</b>               | 1.48 (0.87, 2.09)        | 1.49 (0.90, 2.08)   | 1.88 (1.54, 2.22)        | 1.92 (1.54, 2.30)   | 1.57 (1.29, 1.86)        | 1.61 (1.31, 1.91)   |
| <b>Mixed white and black</b>        | 2.09 (1.56, 2.62)        | 2.01 (1.50, 2.52)   | 1.42 (1.18, 1.66)        | 1.43 (1.17, 1.70)   | 1.42 (1.11, 1.74)        | 1.46 (1.11, 1.80)   |
| <b>Other black</b>                  | 1.66 (0.96, 2.35)        | 1.63 (0.94, 2.31)   | 1.47 (1.21, 1.73)        | 1.48 (1.21, 1.75)   | 1.59 (1.30, 1.87)        | 1.67 (1.35, 1.98)   |
| <b>Other mixed/multiple</b>         | 1.61 (1.12, 2.10)        | 1.55 (1.08, 2.02)   | 1.31 (1.09, 1.53)        | 1.32 (1.07, 1.56)   | 1.15 (0.94, 1.35)        | 1.13 (0.92, 1.35)   |
| <b>Other white</b>                  | 1.92 (1.25, 2.58)        | 1.90 (1.25, 2.56)   | 1.82 (1.48, 2.16)        | 1.88 (1.48, 2.27)   | 1.52 (1.13, 1.91)        | 1.63 (1.23, 2.02)   |
| <b>Other/unknown</b>                | 1.37 (0.87, 1.86)        | 1.38 (0.88, 1.87)   | 1.30 (1.07, 1.52)        | 1.31 (1.08, 1.54)   | 1.25 (1.00, 1.49)        | 1.28 (1.01, 1.55)   |
| <b>White British</b>                | 1                        | 1                   | 1                        | 1                   | 1                        | 1                   |

RR = Risk ratio, 95%CI = 95% Confidence Interval

Reference group is white British

Adjusted for clustering by school, year group, gender, and free school meals

\*Administered at 10 of 12 schools, total sample (n= 3535).

Alternate Table 5 Risk ratios for putative risk factors by ethnic group (white British as reference group)

|                                     | Receives free school meals | Experienced Racial Discrimination | *A few to many or all troublesome friend's vs none | *Parental High Control | *Parental Low Care |
|-------------------------------------|----------------------------|-----------------------------------|----------------------------------------------------|------------------------|--------------------|
| <b>Ethnicity</b>                    | RR (95%CI)                 | RR (95%CI)                        | RR (95%CI)                                         | RR (95%CI)             | RR (95%CI)         |
| <b>Black African</b>                | 1.25 (0.81, 1.25)          | 1.88 (1.22, 2.54)                 | 1.14 (1.05, 1.22)                                  | 1.74 (1.39, 2.09)      | 1.08 (0.90, 1.27)  |
| <b>Black Caribbean</b>              | 1.36 (0.92, 1.36)          | 1.61 (0.95, 2.27)                 | 1.22 (1.12, 1.32)                                  | 1.76 (1.38, 2.14)      | 1.03 (0.87, 1.19)  |
| <b>Indian/Pakistani/Bangladeshi</b> | 0.98 (0.32, 0.98)          | 2.02 (1.06, 2.98)                 | 1.05 (0.91, 1.18)                                  | 1.73 (1.29, 2.16)      | 0.92 (0.73, 1.12)  |
| <b>Latin American</b>               | 0.85 (0.49, 0.85)          | 1.66 (1.10, 2.22)                 | 1.07 (0.93, 1.21)                                  | 2.00 (1.49, 2.51)      | 1.17 (1.00, 1.35)  |
| <b>Mixed white and black</b>        | 1.67 (1.20, 1.67)          | 1.70 (1.17, 2.24)                 | 1.21 (1.05, 1.38)                                  | 1.50 (1.18, 1.82)      | 1.02 (0.85, 1.19)  |
| <b>Other black</b>                  | 1.10 (0.69, 1.10)          | 1.58 (0.75, 2.42)                 | 1.09 (0.93, 1.24)                                  | 1.64 (1.23, 2.05)      | 0.89 (0.71, 1.08)  |
| <b>Other mixed/multiple</b>         | 1.40 (0.97, 1.40)          | 2.32 (1.39, 3.24)                 | 1.08 (0.95, 1.21)                                  | 1.42 (1.08, 1.76)      | 1.06 (0.80, 1.31)  |
| <b>Other white</b>                  | 0.80 (0.51, 0.80)          | 1.33 (1.00, 1.67)                 | 1.05 (0.88, 1.22)                                  | 1.34 (1.05, 1.63)      | 0.89 (0.75, 1.04)  |
| <b>Other/unknown</b>                | 1.46 (0.80, 1.46)          | 1.98 (1.24, 2.72)                 | 1.08 (0.95, 1.21)                                  | 1.64 (1.27, 2.00)      | 1.08 (0.87, 1.28)  |
| <b>White British</b>                | 1                          | 1                                 | 1                                                  | 1                      | 1                  |

RR = Risk ratio, 95%CI = 95% Confidence Interval

Reference group is white British

Adjusted for clustering by school, year group, gender, and free school meals

\*Administered at 10 of 12 schools, total sample (n= 3535).

Alternate Table 6. Risk ratios for conduct problems by ethnic group accounting for putative risk factors (white British as reference group)

|                                     | <b>Base model: age, gender, free school meals</b> | <b>Model 1: base model + racial discrimination</b> | <b>Model 2: model 1+ friends who get into trouble</b> | <b>Model 3: model 2 + high perceived over protection</b> | <b>Model 4: model 3 + low perceived parental care</b> |
|-------------------------------------|---------------------------------------------------|----------------------------------------------------|-------------------------------------------------------|----------------------------------------------------------|-------------------------------------------------------|
|                                     | RR (95%CI)                                        | RR (95%CI)                                         | RR (95%CI)                                            | RR (95%CI)                                               | RR (95%CI)                                            |
| <b>Conduct problems</b>             |                                                   |                                                    |                                                       |                                                          |                                                       |
| <b>Black African</b>                | 1.53 (1.06, 1.99)                                 | 1.39 (0.95, 1.84)                                  | 1.28 (0.85, 1.72)                                     | 1.21 (0.79, 1.64)                                        | 1.19 (0.77, 1.60)                                     |
| <b>Black Caribbean</b>              | 2.11 (1.42, 2.79)                                 | 1.99 (1.34, 2.64)                                  | 1.81 (1.14, 2.49)                                     | 1.72 (1.06, 2.37)                                        | 1.75 (1.07, 2.44)                                     |
| <b>Indian/Pakistani/Bangladeshi</b> | 0.75 (0.24, 1.26)                                 | 0.64 (0.21, 1.07)                                  | 0.62 (0.20, 1.03)                                     | 0.58 (0.20, 0.97)                                        | 0.59 (0.19, 0.99)                                     |
| <b>Latin American</b>               | 1.62 (1.09, 2.16)                                 | 1.50 (0.95, 2.05)                                  | 1.42 (0.82, 2.02)                                     | 1.31 (0.74, 1.87)                                        | 1.27 (0.72, 1.82)                                     |
| <b>Mixed white and black</b>        | 1.93 (1.43, 2.43)                                 | 1.81 (1.31, 2.31)                                  | 1.71 (1.25, 2.16)                                     | 1.66 (1.23, 2.09)                                        | 1.68 (1.20, 2.17)                                     |
| <b>Other black</b>                  | 2.04 (1.33, 2.75)                                 | 1.97 (1.17, 2.77)                                  | 1.95 (1.08, 2.83)                                     | 1.89 (1.04, 2.75)                                        | 2.01 (1.08, 2.94)                                     |
| <b>Other mixed/multiple</b>         | 1.56 (0.84, 2.29)                                 | 1.36 (0.65, 2.07)                                  | 1.27 (0.58, 1.96)                                     | 1.24 (0.55, 1.93)                                        | 1.22 (0.53, 1.91)                                     |
| <b>Other white</b>                  | 1.31 (0.76, 1.87)                                 | 1.28 (0.73, 1.82)                                  | 1.23 (0.66, 1.80)                                     | 1.20 (0.63, 1.78)                                        | 1.25 (0.64, 1.87)                                     |
| <b>Other/unknown</b>                | 1.66 (1.12, 2.20)                                 | 1.50 (0.89, 2.10)                                  | 1.48 (0.77, 2.20)                                     | 1.40 (0.71, 2.09)                                        | 1.40 (0.71, 2.08)                                     |
| <b>White British</b>                | 1                                                 | 1                                                  | 1                                                     | 1                                                        | 1                                                     |
| <b>Fighting/Bullying behaviour</b>  |                                                   |                                                    |                                                       |                                                          |                                                       |
| <b>Black African</b>                | 1.58 (1.36, 1.80)                                 | 1.49 (1.25, 1.72)                                  | 1.44 (1.18, 1.71)                                     | 1.41 (1.15, 1.66)                                        | 1.40 (1.14, 1.66)                                     |
| <b>Black Caribbean</b>              | 1.58 (1.39, 1.77)                                 | 1.51 (1.27, 1.74)                                  | 1.38 (1.10, 1.66)                                     | 1.34 (1.06, 1.62)                                        | 1.35 (1.07, 1.62)                                     |
| <b>Indian/Pakistani/Bangladeshi</b> | 1.28 (0.81, 1.74)                                 | 1.15 (0.69, 1.60)                                  | 1.15 (0.66, 1.65)                                     | 1.12 (0.63, 1.62)                                        | 1.14 (0.60, 1.67)                                     |
| <b>Latin American</b>               | 1.90 (1.55, 2.26)                                 | 1.86 (1.44, 2.27)                                  | 1.93 (1.40, 2.46)                                     | 1.88 (1.34, 2.41)                                        | 1.88 (1.34, 2.42)                                     |
| <b>Mixed white and black</b>        | 1.41 (1.15, 1.67)                                 | 1.33 (1.08, 1.58)                                  | 1.23 (0.96, 1.49)                                     | 1.21 (0.95, 1.46)                                        | 1.21 (0.94, 1.48)                                     |
| <b>Other black</b>                  | 1.84 (1.45, 2.24)                                 | 1.83 (1.31, 2.34)                                  | 1.92 (1.24, 2.61)                                     | 1.90 (1.22, 2.57)                                        | 1.97 (1.24, 2.69)                                     |
| <b>Other mixed/multiple</b>         | 1.47 (1.21, 1.73)                                 | 1.32 (1.05, 1.60)                                  | 1.28 (0.96, 1.60)                                     | 1.27 (0.95, 1.59)                                        | 1.26 (0.92, 1.60)                                     |
| <b>Other white</b>                  | 1.31 (1.07, 1.55)                                 | 1.29 (1.05, 1.53)                                  | 1.27 (0.99, 1.55)                                     | 1.26 (0.98, 1.54)                                        | 1.29 (0.99, 1.59)                                     |
| <b>Other/unknown</b>                | 1.30 (1.06, 1.54)                                 | 1.19 (0.97, 1.40)                                  | 1.16 (0.88, 1.44)                                     | 1.13 (0.86, 1.40)                                        | 1.12 (0.84, 1.39)                                     |
| <b>White British</b>                | 1                                                 | 1                                                  | 1                                                     | 1                                                        | 1                                                     |
| <b>Rule-breaking behaviour</b>      |                                                   |                                                    |                                                       |                                                          |                                                       |
| <b>Black African</b>                | 1.26 (1.01, 1.52)                                 | 1.18 (0.91, 1.46)                                  | 1.10 (0.79, 1.41)                                     | 1.07 (0.76, 1.38)                                        | 1.05 (0.75, 1.35)                                     |

|                                     |                   |                   |                   |                   |                   |
|-------------------------------------|-------------------|-------------------|-------------------|-------------------|-------------------|
| <b>Black Caribbean</b>              | 1.51 (1.21, 1.81) | 1.45 (1.11, 1.80) | 1.36 (0.95, 1.76) | 1.32 (0.91, 1.73) | 1.34 (0.90, 1.78) |
| <b>Indian/Pakistani/Bangladeshi</b> | 0.75 (0.49, 1.02) | 0.67 (0.40, 0.93) | 0.61 (0.35, 0.87) | 0.59 (0.33, 0.85) | 0.59 (0.31, 0.87) |
| <b>Latin American</b>               | 1.61 (1.32, 1.91) | 1.56 (2.04, 2.76) | 1.60 (1.17, 2.04) | 1.55 (1.12, 1.99) | 1.55 (1.10, 1.99) |
| <b>Mixed white and black</b>        | 1.45 (1.11, 1.80) | 1.40 (1.04, 1.76) | 1.33 (0.90, 1.76) | 1.31 (0.88, 1.74) | 1.32 (0.86, 1.78) |
| <b>Other black</b>                  | 1.62 (1.22, 2.02) | 1.59 (1.12, 2.06) | 1.68 (0.99, 2.36) | 1.65 (0.96, 2.34) | 1.73 (0.98, 2.48) |
| <b>Other mixed/multiple</b>         | 1.66 (1.35, 1.97) | 1.56 (1.23, 1.89) | 1.64 (1.20, 2.07) | 1.62 (1.18, 2.07) | 1.65 (1.15, 2.16) |
| <b>Other white</b>                  | 1.27 (0.99, 1.56) | 1.26 (0.95, 1.56) | 1.26 (0.92, 1.60) | 1.25 (0.91, 1.58) | 1.30 (0.94, 1.66) |
| <b>Other/unknown</b>                | 1.12 (0.91, 1.34) | 1.04 (0.82, 1.25) | 1.00 (0.73, 1.27) | 0.97 (0.71, 1.23) | 0.95 (0.70, 1.20) |
| <b>White British</b>                | 1                 | 1                 | 1                 | 1                 | 1                 |

*RR = Risk ratio, 95%CI = 95% Confidence Interval*

*Reference group is white British in each model*

*For the purpose of comparison across models, all models include observations from 10 schools n =3535*
